# Supplementary material for: Constructing graphs from genetic encodings
Source: PubMed Central journal article supplement (PMC8225892; doi:10.1038/s41598-021-92577-2), 2021-06-24
Supplement: 41598_2021_92577_MOESM1_ESM.pdf [file 41598_2021_92577_MOESM1_ESM.pdf]

# Constructing Graphs from Genetic Encodings

Dániel L. Barabási and Dániel Czégel

Correspondence: [barabasi@fas.harvard.edu](mailto:barabasi@fas.harvard.edu)

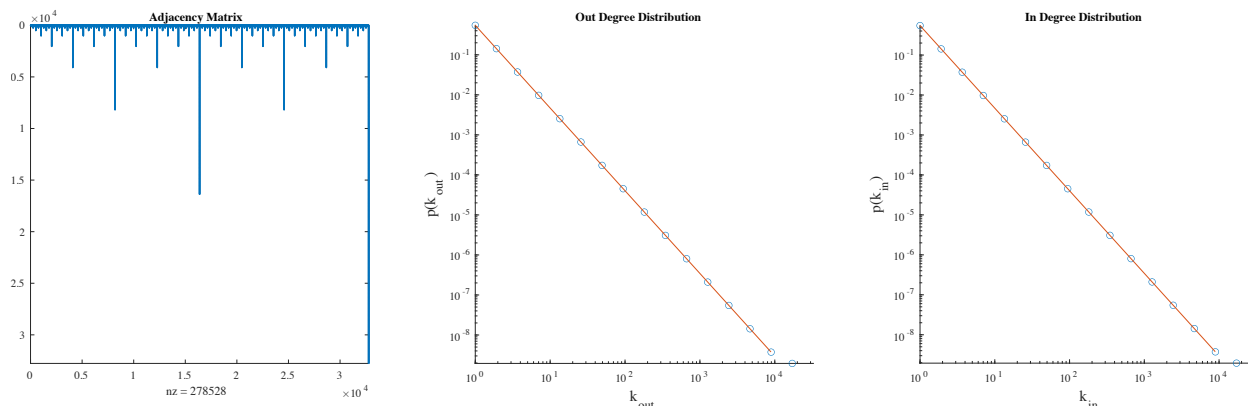

Figure S 1: **Scale-Free distributions using the connectome model.** Left: Adjacency matrix resulting from  $b = 15$ . Middle, right: Degree distributions of scale-free graph of  $b = 15$ . Both in- and out-degree distributions are best fit by  $p(k) = 0.5 * k^{-1}$ , as long as the outlier highest degree is excluded.

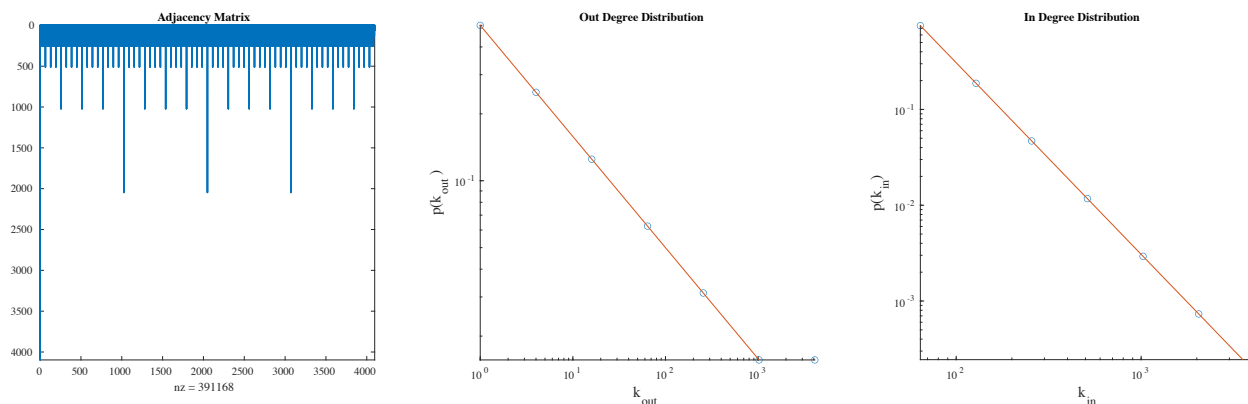

Figure S 2: **Scale Free Distribution with  $-2$  exponent.** Left: Adjacency matrix resulting from  $b = 12$ . Middle, right: Degree distributions of scale-free graph of  $b = 12$ . While the standard model has matching in- and out-degree distribution, this alternative model has an out-degree distribution is best fit by  $p_{out} \sim k^{-0.5}$ , and in-degree distribution is best fit by  $p_{in} \sim k^{-2}$ .

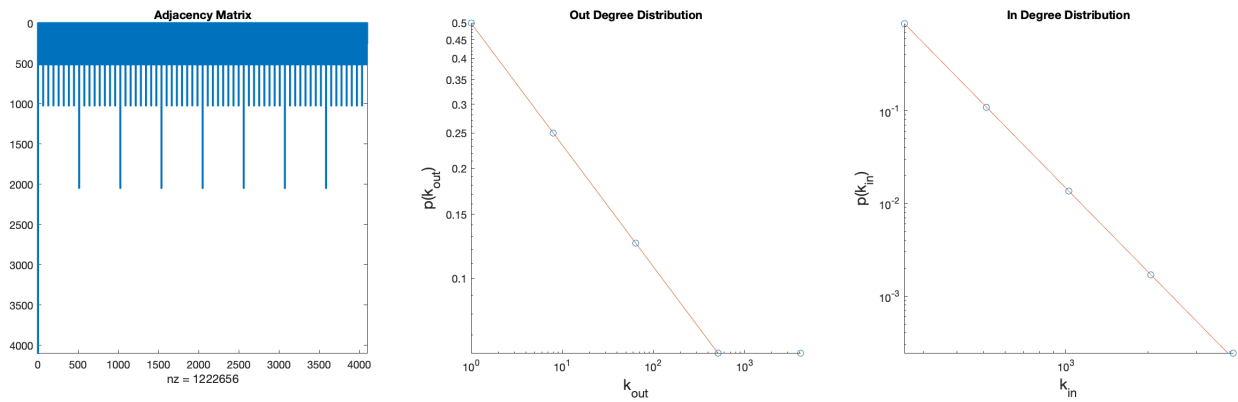

Figure S 3: **Scale Free Distribution with  $-3$  exponent.** Left: Adjacency matrix resulting from  $b = 12$ . Middle, right: Degree distributions of scale-free graph of  $b = 12$ . While the standard model has matching in- and out-degree distribution, this alternative model has an out-degree distribution is best fit by  $p_{out} \sim k^{-1/3}$ , and in-degree distribution is best fit by  $p_{in} \sim k^{-3}$ .

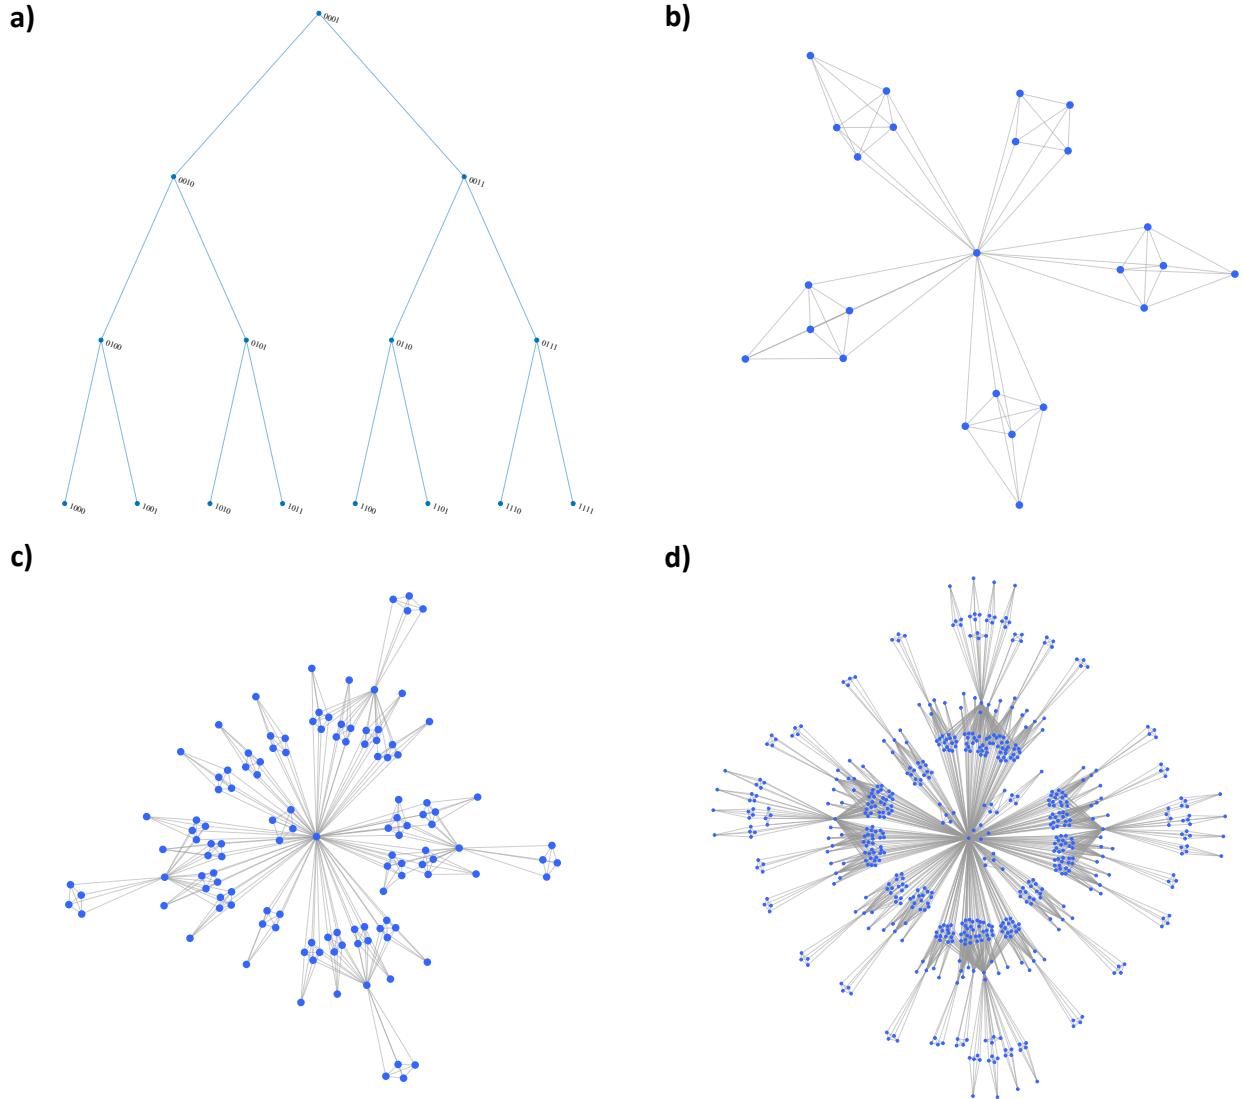

Figure S 4: **Heuristic Models for Well-Studied Networks.** (a) Binary tree of depth 4, with node barcodes labeled. (b-d) Hierarchical networks for  $n = 1$  (b),  $n = 2$  (c), and  $n = 3$  (d).

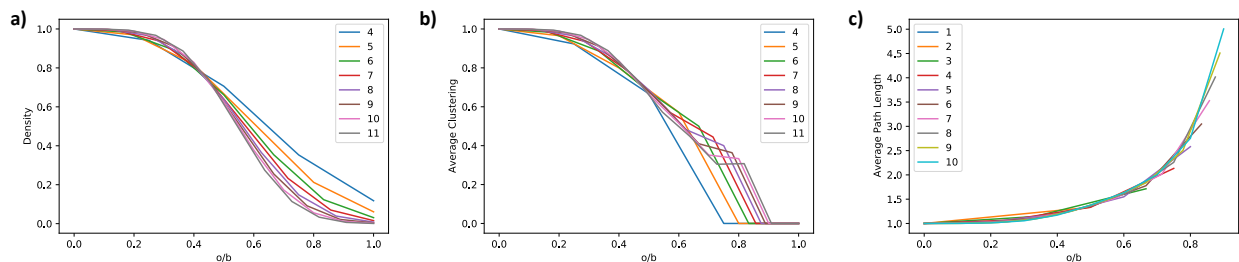

Figure S 5: **Networks Arising from Homophily Wiring Rules.** Plots of (a) Density, (b) Average Clustering, and (c) Average Path Length as a function of  $o/b$  (overlapping bits normalized by bit-length of identity) are shown for various system sizes (expressed as  $b$  values in legend). For all metrics the various system sizes ( $b$  values) display nearly identical scaling, with deviations attributable to small system sizes.

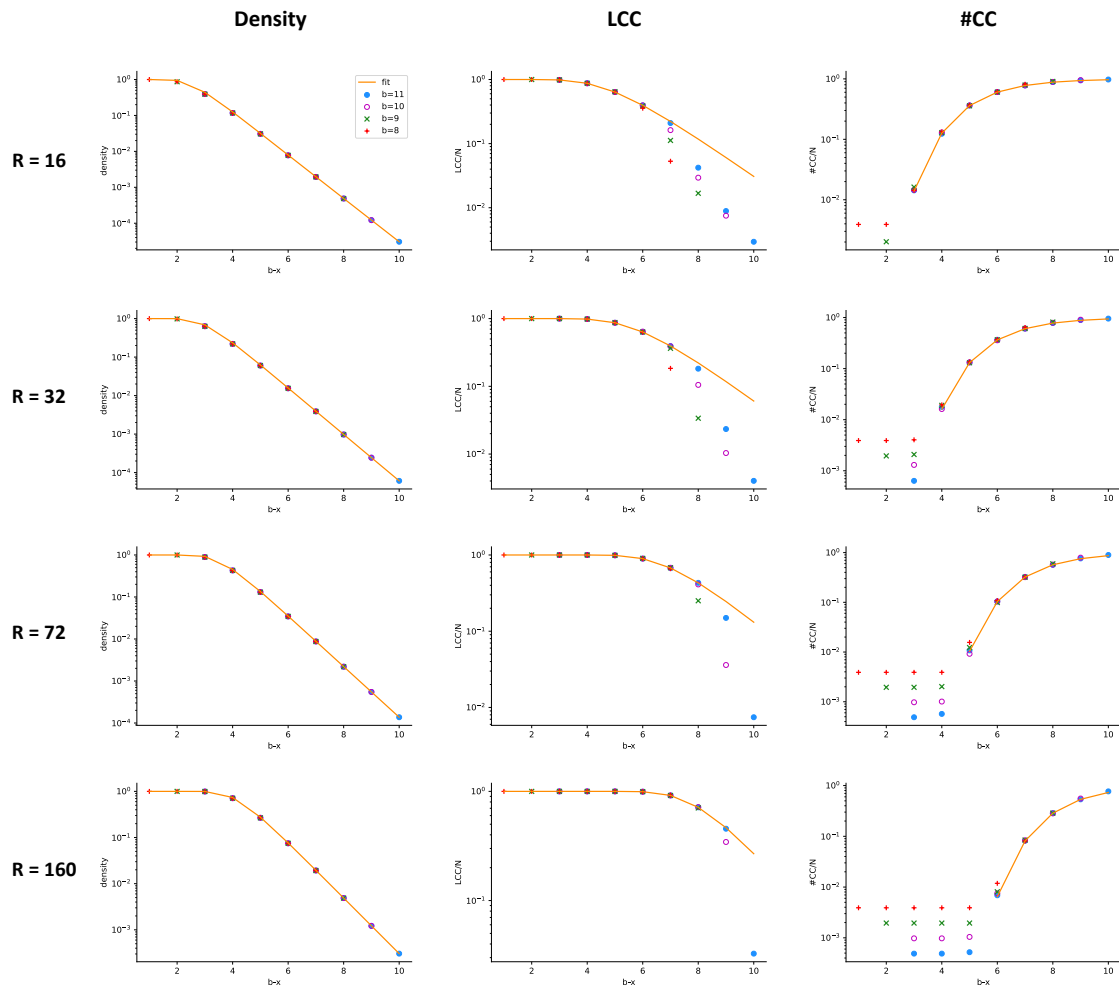

Figure S 6: **Scaling of Network Metrics with System Size.** Plots of Density, LCC and #CC are shown for four  $r$  values. In all metrics and  $r$  values, the various system sizes display nearly identical scaling, with deviations attributable to finite size arguments, as expressed in Methods [1.3.2](#).

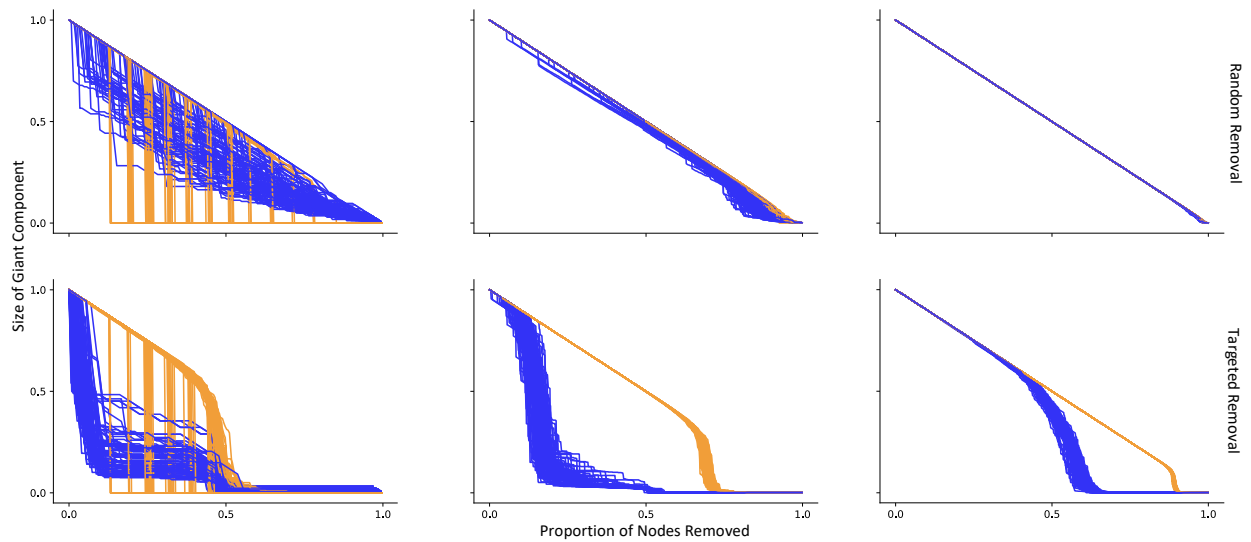

Figure S 7: **Additional Simulations for Network Robustness.** Robustness of RG networks (blue) and ER networks of equivalent density (orange), under random removal (top row) and targeted attacks (bottom row). Each line corresponds to a single simulation, for a total of 100 initialization of each RG and ER parameter set. Each column's  $r$  and  $x$  values correspond to the values set in Figure 4d-f above (left:  $x = 3$ ,  $r = 15$ , middle:  $x = 4$ ,  $r = 30$ , right:  $x = 5$ ,  $r = 70$ ). The y-axis measures the relative size of the current LCC compared to the initial giant component, and the x-axis corresponds to the proportion of nodes removed. For both y- and x-axes, the first tick corresponds to 0.5 and the second tick, where visible, corresponds to 1.
